# Supplementary material for: Optineurin downregulation induces endoplasmic reticulum stress, chaperone-mediated autophagy, and apoptosis in pancreatic cancer cells
Source: PubMed Central journal article supplement (PMC6689035; doi:10.1038/s41420-019-0206-2), 2019-08-09
Supplement: 41420_2019_206_MOESM2_ESM.pdf [file 41420_2019_206_MOESM2_ESM.pdf]

# Supplementary Figure 2

## A Miapaca

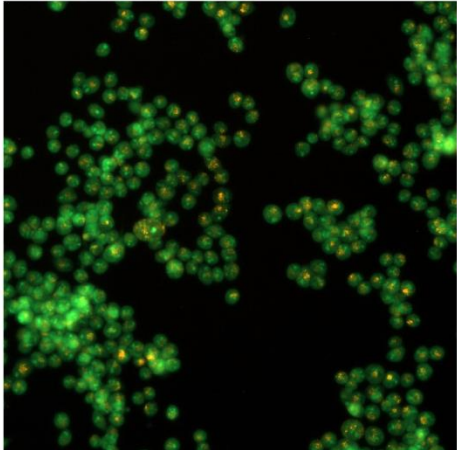

siRNA Control

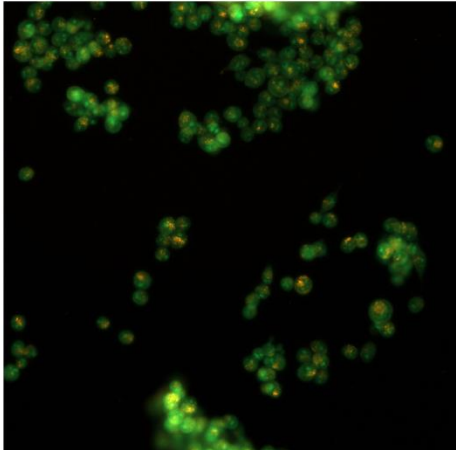

siRNA OPTN

## B Suit2-007

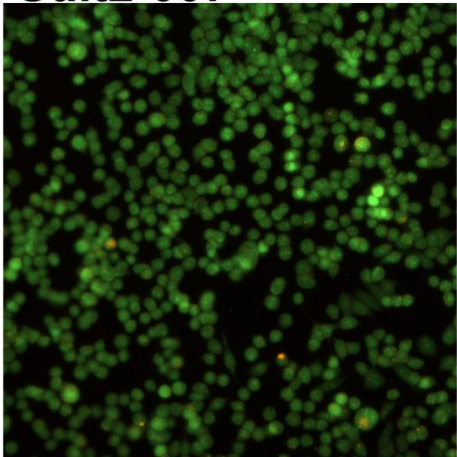

siRNA control

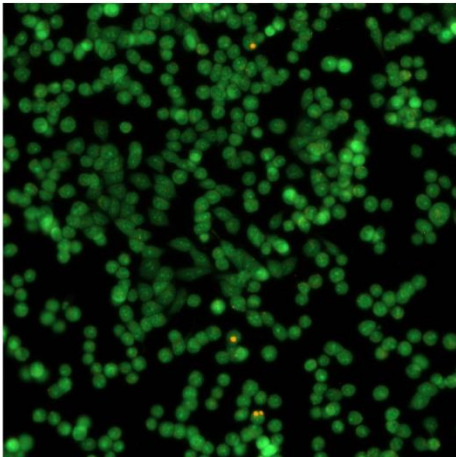

siRNA OPTN

**Supplementary Figure 2:** Acridine orange staining of acidic vacuoles indicates the presence of autophagosomes for both, nonspecific control and OPTN-KD samples from Miapaca and Suit2-007 PDAC cells. The acidic vacuoles stained orange following exposure to acridine orange stain (excitation 488/ emission 505-530).
