# Supplementary material for: Optineurin downregulation induces endoplasmic reticulum stress, chaperone-mediated autophagy, and apoptosis in pancreatic cancer cells
Source: PubMed Central journal article supplement (PMC6689035; doi:10.1038/s41420-019-0206-2), 2019-08-09
Supplement: 41420_2019_206_MOESM5_ESM.pdf [file 41420_2019_206_MOESM5_ESM.pdf]

**Supplementary Table 1: Modulated genes in Miapaca cells in response to OPTN knockdown**

| <b>Gene no.</b>             | <b>Gene symbol</b> | <b>Entrez Gene Name</b>                                        | <b>Expression fold change</b> | <b>Cellular location of the respective protein</b> | <b>Function / nature of the protein</b> |
|-----------------------------|--------------------|----------------------------------------------------------------|-------------------------------|----------------------------------------------------|-----------------------------------------|
| <b>Down-regulated genes</b> |                    |                                                                |                               |                                                    |                                         |
| 1                           | HMMR               | hyaluronan mediated motility receptor                          | -2,586                        | Plasma Membrane                                    | transmembrane receptor                  |
| 2                           | P4HA2              | prolyl 4-hydroxylase subunit alpha 2                           | -2,251                        | Cytoplasm                                          | transporter                             |
| 3                           | FAR1               | fatty acyl-CoA reductase 1                                     | -2,137                        | Cytoplasm                                          | enzyme                                  |
| 4                           | NCKAP1             | NCK associated protein 1                                       | -2,133                        | Plasma Membrane                                    | other                                   |
| 5                           | VDAC3P1            | voltage dependent anion channel 3 pseudogene 1                 | -2,103                        | Other                                              | other                                   |
| 6                           | CCT6P1             | chaperonin containing TCP1 subunit 6 pseudogene 1              | -2,081                        | Other                                              | other                                   |
| 7                           | PSMA5              | proteasome subunit alpha 5                                     | -2,019                        | Cytoplasm                                          | peptidase                               |
| 8                           | CENPQ              | centromere protein Q                                           | -2,012                        | Nucleus                                            | other                                   |
| 9                           | CCDC25             | coiled-coil domain containing 25                               | -2,004                        | Cytoplasm                                          | other                                   |
| 10                          | AAGAB              | alpha and gamma adaptin binding protein                        | -1,987                        | Cytoplasm                                          | other                                   |
| 11                          | SLMAP              | sarcolemma associated protein                                  | -1,985                        | Plasma Membrane                                    | other                                   |
| 12                          | USP38              | ubiquitin specific peptidase 38                                | -1,956                        | Other                                              | peptidase                               |
| 13                          | CCT6P3             | chaperonin containing TCP1 subunit 6 pseudogene 3              | -1,942                        | Other                                              | other                                   |
| 14                          | C17orf53           | chromosome 17 open reading frame 53                            | -1,92                         | Other                                              | other                                   |
| 15                          | NUS1P1             | NUS1 dehydrodolichyl diphosphate synthase subunit pseudogene 1 | -1,878                        | Other                                              | other                                   |
| 16                          | FAM35A             | family with sequence similarity 35 member A                    | -1,867                        | Extracellular Space                                | other                                   |
| 17                          | NSRP1              | nuclear speckle splicing regulatory protein 1                  | -1,864                        | Nucleus                                            | other                                   |
| 18                          | BRWD1              | bromodomain and WD repeat domain containing 1                  | -1,857                        | Nucleus                                            | transcription regulator                 |
| 19                          | G3BP2              | G3BP stress granule assembly factor 2                          | -1,853                        | Cytoplasm                                          | enzyme                                  |
| 20                          | COPZ1              | coatamer protein complex subunit zeta 1                        | -1,837                        | Cytoplasm                                          | transporter                             |
| 21                          | SLC39A10           | solute carrier family 39 member 10                             | -1,825                        | Extracellular Space                                | transporter                             |
| 22                          | MFAP1              | microfibril associated protein 1                               | -1,796                        | Extracellular Space                                | other                                   |
| 23                          | POLQ               | DNA polymerase theta                                           | -1,785                        | Nucleus                                            | enzyme                                  |
| 24                          | CAV2               | caveolin 2                                                     | -1,782                        | Plasma Membrane                                    | other                                   |

|    |                |                                                                             |        |                 |                         |
|----|----------------|-----------------------------------------------------------------------------|--------|-----------------|-------------------------|
| 25 | DEPDC1         | DEP domain containing 1                                                     | -1,775 | Nucleus         | transcription regulator |
| 26 | CCT6A          | chaperonin containing TCP1 subunit 6A                                       | -1,767 | Cytoplasm       | other                   |
| 27 | VDAC3          | voltage dependent anion channel 3                                           | -1,76  | Cytoplasm       | ion channel             |
| 28 | SLC25A44       | solute carrier family 25 member 44                                          | -1,752 | Cytoplasm       | transporter             |
| 29 | ARMCX5-GPRASP2 | G protein-coupled receptor associated sorting protein 2                     | -1,752 | Plasma Membrane | other                   |
| 30 | PPP1R12B       | protein phosphatase 1 regulatory subunit 12B                                | -1,747 | Cytoplasm       | phosphatase             |
| 31 | MAPRE1         | microtubule associated protein RP/EB family member 1                        | -1,728 | Cytoplasm       | other                   |
| 32 | YWHAH          | tyrosine 3-monooxygenase/tryptophan 5-monooxygenase activation protein eta  | -1,726 | Cytoplasm       | transcription regulator |
| 33 | LEMD3          | LEM domain containing 3                                                     | -1,724 | Nucleus         | other                   |
| 34 | CSTF3          | cleavage stimulation factor subunit 3                                       | -1,724 | Nucleus         | other                   |
| 35 | SMYD2          | SET and MYND domain containing 2                                            | -1,723 | Cytoplasm       | enzyme                  |
| 36 | BNIP3L         | BCL2 interacting protein 3 like                                             | -1,72  | Cytoplasm       | other                   |
| 37 | STARD7         | StAR related lipid transfer domain containing 7                             | -1,713 | Cytoplasm       | other                   |
| 38 | PHKB           | phosphorylase kinase regulatory subunit beta                                | -1,709 | Cytoplasm       | kinase                  |
| 39 | CENPK          | centromere protein K                                                        | -1,698 | Nucleus         | other                   |
| 40 | LBR            | lamin B receptor                                                            | -1,697 | Nucleus         | enzyme                  |
| 41 | E2F2           | E2F transcription factor 2                                                  | -1,689 | Nucleus         | transcription regulator |
| 42 | MGAT5          | mannosyl (alpha-1,6-)-glycoprotein beta-1,6-N-acetylglucosaminyltransferase | -1,687 | Cytoplasm       | enzyme                  |
| 43 | PIGA           | phosphatidylinositol glycan anchor biosynthesis class A                     | -1,686 | Cytoplasm       | enzyme                  |
| 44 | ATPAF1         | ATP synthase mitochondrial F1 complex assembly factor 1                     | -1,684 | Cytoplasm       | other                   |
| 45 | ARMCX3         | armadillo repeat containing, X-linked 3                                     | -1,684 | Cytoplasm       | other                   |
| 46 | PM20D2         | peptidase M20 domain containing 2                                           | -1,669 | Nucleus         | peptidase               |
| 47 | IGF2BP2        | insulin like growth factor 2 mRNA binding protein 2                         | -1,668 | Cytoplasm       | translation regulator   |
| 48 | CMAS           | cytidine monophosphate N-acetylneuraminic acid synthetase                   | -1,663 | Nucleus         | enzyme                  |
| 49 | YWHAZ          | tyrosine 3-monooxygenase/tryptophan 5-monooxygenase activation protein zeta | -1,635 | Cytoplasm       | enzyme                  |
| 50 | CENPI          | centromere protein I                                                        | -1,63  | Nucleus         | other                   |
| 51 | FAM214B        | family with sequence similarity 214 member B                                | -1,623 | Nucleus         | other                   |
| 52 | ZNF622         | zinc finger protein 622                                                     | -1,622 | Nucleus         | other                   |

|    |                         |                                                    |        |                 |                         |
|----|-------------------------|----------------------------------------------------|--------|-----------------|-------------------------|
| 53 | MAPK6                   | mitogen-activated protein kinase 6                 | -1,621 | Cytoplasm       | kinase                  |
| 54 | AKAP11                  | A-kinase anchoring protein 11                      | -1,62  | Cytoplasm       | other                   |
| 55 | API5                    | apoptosis inhibitor 5                              | -1,62  | Cytoplasm       | other                   |
| 56 | EIF4G1                  | eukaryotic translation initiation factor 4 gamma 1 | -1,618 | Cytoplasm       | translation regulator   |
| 57 | CKAP2L                  | cytoskeleton associated protein 2 like             | -1,61  | Cytoplasm       | other                   |
| 58 | KIAA0586                | KIAA0586                                           | -1,605 | Cytoplasm       | other                   |
| 59 | ACLY                    | ATP citrate lyase                                  | -1,604 | Cytoplasm       | enzyme                  |
| 60 | CCDC68                  | coiled-coil domain containing 68                   | -1,603 | Other           | other                   |
| 61 | SERP1                   | stress associated endoplasmic reticulum protein 1  | -1,6   | Cytoplasm       | other                   |
| 62 | MIPPEP                  | mitochondrial intermediate peptidase               | -1,599 | Cytoplasm       | peptidase               |
| 63 | TAF2                    | TATA-box binding protein associated factor 2       | -1,598 | Nucleus         | transcription regulator |
| 64 | ZCCHC3                  | zinc finger CCHC-type containing 3                 | -1,594 | Other           | other                   |
| 65 | BMPR2                   | bone morphogenetic protein receptor type 2         | -1,593 | Plasma Membrane | kinase                  |
| 66 | KIAA1671                | KIAA1671                                           | -1,584 | Other           | other                   |
| 67 | POLD1                   | DNA polymerase delta 1, catalytic subunit          | -1,579 | Nucleus         | enzyme                  |
| 68 | RBL2                    | RB transcriptional corepressor like 2              | -1,575 | Nucleus         | other                   |
| 69 | COPS7B                  | COP9 signalosome subunit 7B                        | -1,574 | Cytoplasm       | other                   |
| 70 | C1orf112                | chromosome 1 open reading frame 112                | -1,573 | Other           | other                   |
| 71 | CALM1 (includes others) | calmodulin 1                                       | -1,572 | Cytoplasm       | other                   |
| 72 | OSBPL8                  | oxysterol binding protein like 8                   | -1,57  | Plasma Membrane | transporter             |
| 73 | LASP1                   | LIM and SH3 protein 1                              | -1,568 | Cytoplasm       | transporter             |
| 74 | C1GALT1C1               | C1GALT1 specific chaperone 1                       | -1,565 | Cytoplasm       | other                   |
| 75 | BZW2                    | basic leucine zipper and W2 domains 2              | -1,565 | Cytoplasm       | translation regulator   |
| 76 | ACYP1                   | acylphosphatase 1                                  | -1,56  | Cytoplasm       | enzyme                  |
| 77 | RIF1                    | replication timing regulatory factor 1             | -1,553 | Nucleus         | other                   |
| 78 | TTYH3                   | tweety family member 3                             | -1,553 | Plasma Membrane | ion channel             |
| 79 | CDC45                   | cell division cycle 45                             | -1,549 | Nucleus         | other                   |
| 80 | MCM2                    | minichromosome maintenance complex component 2     | -1,548 | Nucleus         | enzyme                  |
| 81 | SAE1                    | SUMO1 activating enzyme subunit 1                  | -1,546 | Cytoplasm       | enzyme                  |
| 82 | C9orf40                 | chromosome 9 open reading frame 40                 | -1,54  | Other           | other                   |
| 83 | LRRC20                  | leucine rich repeat containing 20                  | -1,538 | Other           | other                   |
| 84 | C5orf51                 | chromosome 5 open reading frame 51                 | -1,537 | Other           | other                   |

|     |          |                                                                   |        |                 |                         |
|-----|----------|-------------------------------------------------------------------|--------|-----------------|-------------------------|
| 85  | AMFR     | autocrine motility factor receptor                                | -1,535 | Plasma Membrane | transmembrane receptor  |
| 86  | RPN1     | ribophorin I                                                      | -1,535 | Cytoplasm       | enzyme                  |
| 87  | PCGF6    | polycomb group ring finger 6                                      | -1,534 | Nucleus         | transcription regulator |
| 88  | MYO10    | myosin X                                                          | -1,534 | Cytoplasm       | enzyme                  |
| 89  | DHX29    | DExH-box helicase 29                                              | -1,533 | Cytoplasm       | enzyme                  |
| 90  | DCBLD2   | discoidin, CUB and LCCL domain containing 2                       | -1,531 | Plasma Membrane | other                   |
| 91  | IDI1     | isopentenyl-diphosphate delta isomerase 1                         | -1,531 | Cytoplasm       | enzyme                  |
| 92  | CIRBP    | cold inducible RNA binding protein                                | -1,528 | Nucleus         | translation regulator   |
| 93  | KRR1     | KRR1, small subunit processome component homolog                  | -1,527 | Nucleus         | other                   |
| 94  | MAPK1    | mitogen-activated protein kinase 1                                | -1,525 | Cytoplasm       | kinase                  |
| 95  | PARG     | poly(ADP-ribose) glycohydrolase                                   | -1,524 | Cytoplasm       | enzyme                  |
| 96  | TBL1XR1  | transducin beta like 1 X-linked receptor 1                        | -1,519 | Nucleus         | transcription regulator |
| 97  | STK38    | serine/threonine kinase 38                                        | -1,519 | Nucleus         | kinase                  |
| 98  | TIGAR    | TP53 induced glycolysis regulatory phosphatase                    | -1,519 | Cytoplasm       | enzyme                  |
| 99  | TTC33    | tetratricopeptide repeat domain 33                                | -1,519 | Other           | other                   |
| 100 | ELP5     | elongator acetyltransferase complex subunit 5                     | -1,518 | Cytoplasm       | other                   |
| 101 | VKORC1L1 | vitamin K epoxide reductase complex subunit 1 like 1              | -1,511 | Cytoplasm       | enzyme                  |
| 102 | PKP4     | plakophilin 4                                                     | -1,509 | Plasma Membrane | other                   |
| 103 | DLAT     | dihydrolipoamide S-acetyltransferase                              | -1,508 | Cytoplasm       | enzyme                  |
| 104 | BARX2    | BARX homeobox 2                                                   | -1,506 | Nucleus         | transcription regulator |
| 105 | KIF2C    | kinesin family member 2C                                          | -1,506 | Nucleus         | other                   |
| 106 | NUP88    | nucleoporin 88                                                    | -1,506 | Nucleus         | transporter             |
| 107 | MASTL    | microtubule associated serine/threonine kinase like               | -1,506 | Cytoplasm       | kinase                  |
| 108 | NEDD1    | neural precursor cell expressed, developmentally down-regulated 1 | -1,505 | Cytoplasm       | other                   |
| 109 | CENPE    | centromere protein E                                              | -1,504 | Nucleus         | other                   |
| 110 | TACC1    | transforming acidic coiled-coil containing protein 1              | -1,503 | Nucleus         | other                   |
| 111 | MAD2L1   | mitotic arrest deficient 2 like 1                                 | -1,503 | Nucleus         | other                   |
| 112 | PGAM1P8  | phosphoglycerate mutase 1 pseudogene 8                            | -1,502 | Other           | other                   |

|     |          |                                                                    |        |                     |                            |
|-----|----------|--------------------------------------------------------------------|--------|---------------------|----------------------------|
| 113 | HMGB1P10 | high mobility group box 1 pseudogene 10                            | -1,501 | Nucleus             | other                      |
|     |          | <b>Up-regulated genes</b>                                          |        |                     |                            |
| 114 | RPL14    | ribosomal protein L14                                              | 1,502  | Cytoplasm           | other                      |
| 115 | PMAIP1   | phorbol-12-myristate-13-acetate-induced protein 1                  | 1,502  | Cytoplasm           | other                      |
| 116 | AES      | amino-terminal enhancer of split                                   | 1,503  | Nucleus             | transcription<br>regulator |
| 117 | HAX1     | HCLS1 associated protein X-1                                       | 1,504  | Cytoplasm           | other                      |
| 118 | OCRL     | OCRL, inositol polyphosphate-5-phosphatase                         | 1,504  | Cytoplasm           | phosphatase                |
| 119 | PIP4K2B  | phosphatidylinositol-5-phosphate 4-kinase type 2 beta              | 1,504  | Cytoplasm           | kinase                     |
| 120 | RNF146   | ring finger protein 146                                            | 1,505  | Cytoplasm           | enzyme                     |
| 121 | BTRC     | beta-transducin repeat containing E3 ubiquitin protein ligase      | 1,506  | Cytoplasm           | enzyme                     |
| 122 | DNAJB6   | DnaJ heat shock protein family (Hsp40) member B6                   | 1,506  | Nucleus             | transcription<br>regulator |
| 123 | APOLD1   | apolipoprotein L domain containing 1                               | 1,509  | Other               | other                      |
| 124 | ULK4P1   | ULK4 pseudogene 1                                                  | 1,51   | Other               | other                      |
| 125 | SARS2    | seryl-tRNA synthetase 2, mitochondrial                             | 1,512  | Cytoplasm           | enzyme                     |
| 126 | NQO1     | NAD(P)H quinone dehydrogenase 1                                    | 1,513  | Cytoplasm           | enzyme                     |
| 127 | CFD      | complement factor D                                                | 1,514  | Extracellular Space | peptidase                  |
| 128 | IFI27L2  | interferon alpha inducible protein 27 like 2                       | 1,514  | Other               | other                      |
| 129 | ATP1B1   | ATPase Na <sup>+</sup> /K <sup>+</sup> transporting subunit beta 1 | 1,515  | Plasma Membrane     | transporter                |
| 130 | PABPC1P4 | poly(A) binding protein cytoplasmic 1 pseudogene 4                 | 1,52   | Other               | other                      |
| 131 | SPNS1    | sphingolipid transporter 1 (putative)                              | 1,521  | Cytoplasm           | transporter                |
| 132 | RPL17P36 | ribosomal protein L17 pseudogene 36                                | 1,522  | Other               | other                      |
| 133 | RPS4XP16 | ribosomal protein S4X pseudogene 16                                | 1,522  | Other               | other                      |
| 134 | TFPI     | tissue factor pathway inhibitor                                    | 1,522  | Extracellular Space | other                      |
| 135 | SLC35E1  | solute carrier family 35 member E1                                 | 1,523  | Cytoplasm           | other                      |
| 136 | STX4     | syntaxin 4                                                         | 1,525  | Plasma Membrane     | transporter                |
| 137 | SLC44A1  | solute carrier family 44 member 1                                  | 1,525  | Plasma Membrane     | transporter                |
| 138 | FSD1     | fibronectin type III and SPRY domain containing 1                  | 1,525  | Cytoplasm           | other                      |
| 139 | CREBRF   | CREB3 regulatory factor                                            | 1,529  | Nucleus             | transcription<br>regulator |
| 140 | SELENOM  | selenoprotein M                                                    | 1,532  | Cytoplasm           | other                      |

|     |                            |                                                    |       |                     |                            |
|-----|----------------------------|----------------------------------------------------|-------|---------------------|----------------------------|
| 141 | HTATIP2                    | HIV-1 Tat interactive protein 2                    | 1,536 | Nucleus             | transcription regulator    |
| 142 | C6orf48                    | chromosome 6 open reading frame 48                 | 1,537 | Other               | other                      |
| 143 | WARS                       | tryptophanyl-tRNA synthetase                       | 1,538 | Cytoplasm           | enzyme                     |
| 144 | WWP2                       | WW domain containing E3 ubiquitin protein ligase 2 | 1,539 | Cytoplasm           | enzyme                     |
| 145 | CAMK1                      | calcium/calmodulin dependent protein kinase I      | 1,539 | Cytoplasm           | kinase                     |
| 146 | EEF1B2                     | eukaryotic translation elongation factor 1 beta 2  | 1,542 | Cytoplasm           | translation regulator      |
| 147 | NOL3                       | nucleolar protein 3                                | 1,544 | Nucleus             | other                      |
| 148 | HTRA1                      | HtrA serine peptidase 1                            | 1,546 | Extracellular Space | peptidase                  |
| 149 | C15orf40                   | chromosome 15 open reading frame 40                | 1,546 | Other               | other                      |
| 150 | KRT40                      | keratin 40                                         | 1,548 | Cytoplasm           | other                      |
| 151 | NUB1                       | negative regulator of ubiquitin like proteins 1    | 1,549 | Nucleus             | other                      |
| 152 | ERC1                       | ELKS/RAB6-interacting/CAST family member 1         | 1,553 | Cytoplasm           | other                      |
| 153 | HIST2H2AA3 /<br>HIST2H2AA4 | histone cluster 2 H2A family member a3             | 1,554 | Nucleus             | other                      |
| 154 | CTH                        | cystathionine gamma-lyase                          | 1,554 | Cytoplasm           | enzyme                     |
| 155 | UPF3B                      | UPF3B, regulator of nonsense mediated mRNA decay   | 1,555 | Nucleus             | transporter                |
| 156 | RPLP1                      | ribosomal protein lateral stalk subunit P1         | 1,555 | Cytoplasm           | other                      |
| 157 | HMGA2                      | high mobility group AT-hook 2                      | 1,558 | Nucleus             | enzyme                     |
| 158 | GRN                        | granulin precursor                                 | 1,559 | Extracellular Space | growth factor              |
| 159 | CCNB1IP1                   | cyclin B1 interacting protein 1                    | 1,564 | Nucleus             | enzyme                     |
| 160 | DCAF13                     | DDB1 and CUL4 associated factor 13                 | 1,564 | Nucleus             | other                      |
| 161 | RAB1C                      | RAB1C, member RAS oncogene family pseudogene       | 1,565 | Other               | other                      |
| 162 | COLGALT2                   | collagen beta(1-O)galactosyltransferase 2          | 1,565 | Cytoplasm           | enzyme                     |
| 163 | RPL12P14                   | ribosomal protein L12 pseudogene 14                | 1,565 | Other               | other                      |
| 164 | HTR1D                      | 5-hydroxytryptamine receptor 1D                    | 1,566 | Plasma Membrane     | G-protein coupled receptor |
| 165 | UNC119                     | unc-119 lipid binding chaperone                    | 1,566 | Cytoplasm           | other                      |
| 166 | C12orf75                   | chromosome 12 open reading frame 75                | 1,571 | Other               | other                      |
| 167 | TSTA3                      | tissue specific transplantation antigen P35B       | 1,572 | Plasma Membrane     | enzyme                     |
| 168 | PTMA                       | prothymosin, alpha                                 | 1,573 | Nucleus             | other                      |
| 169 | GNG5                       | G protein subunit gamma 5                          | 1,574 | Plasma Membrane     | other                      |
| 170 | CALB2                      | calbindin 2                                        | 1,579 | Cytoplasm           | other                      |

|     |           |                                                                                                         |       |                 |                            |
|-----|-----------|---------------------------------------------------------------------------------------------------------|-------|-----------------|----------------------------|
| 171 | LOC441087 | uncharacterized LOC441087                                                                               | 1,581 | Other           | other                      |
| 172 | TRIB3     | tribbles pseudokinase 3                                                                                 | 1,583 | Nucleus         | kinase                     |
| 173 | HIST2H2BE | histone cluster 2 H2B family member e                                                                   | 1,585 | Nucleus         | other                      |
| 174 | N4BP2L2   | NEDD4 binding protein 2 like 2                                                                          | 1,586 | Nucleus         | transcription<br>regulator |
| 175 | MYO5A     | myosin VA                                                                                               | 1,587 | Cytoplasm       | enzyme                     |
| 176 | ZFP36     | ZFP36 ring finger protein                                                                               | 1,587 | Nucleus         | transcription<br>regulator |
| 177 | RNA28SN5  | RNA, 28S ribosomal N5                                                                                   | 1,59  | Other           | other                      |
| 178 | MCL1      | MCL1, BCL2 family apoptosis regulator                                                                   | 1,59  | Cytoplasm       | transporter                |
| 179 | CEBPB     | CCAAT/enhancer binding protein beta                                                                     | 1,591 | Nucleus         | transcription<br>regulator |
| 180 | TMEM238   | transmembrane protein 238                                                                               | 1,593 | Other           | other                      |
| 181 | MED1      | mediator complex subunit 1                                                                              | 1,595 | Nucleus         | transcription<br>regulator |
| 182 | RPL26P6   | ribosomal protein L26 pseudogene 6                                                                      | 1,597 | Other           | other                      |
| 183 | WDR41     | WD repeat domain 41                                                                                     | 1,598 | Cytoplasm       | other                      |
| 184 | ADARB1    | adenosine deaminase, RNA specific B1                                                                    | 1,598 | Nucleus         | enzyme                     |
| 185 | SMARCD3   | SWI/SNF related, matrix associated, actin dependent regulator<br>of chromatin, subfamily d, member 3    | 1,599 | Nucleus         | transcription<br>regulator |
| 186 | RNF149    | ring finger protein 149                                                                                 | 1,6   | Cytoplasm       | enzyme                     |
| 187 | CARS      | cysteinyl-tRNA synthetase                                                                               | 1,603 | Cytoplasm       | enzyme                     |
| 188 | HMGN1     | high mobility group nucleosome binding domain 1                                                         | 1,603 | Nucleus         | transcription<br>regulator |
| 189 | TNFRSF25  | TNF receptor superfamily member 25                                                                      | 1,611 | Plasma Membrane | transmembrane<br>receptor  |
| 190 | RPL14P1   | ribosomal protein L14 pseudogene 1                                                                      | 1,618 | Other           | other                      |
| 191 | AMMECR1   | Alport syndrome, mental retardation, midface hypoplasia and<br>elliptocytosis chromosomal region gene 1 | 1,621 | Nucleus         | other                      |
| 192 | PPP2CB    | protein phosphatase 2 catalytic subunit beta                                                            | 1,622 | Cytoplasm       | phosphatase                |
| 193 | HIST3H2A  | histone cluster 3 H2A                                                                                   | 1,627 | Nucleus         | other                      |
| 194 | UBE2G2    | ubiquitin conjugating enzyme E2 G2                                                                      | 1,631 | Cytoplasm       | enzyme                     |
| 195 | NBDY      | negative regulator of P-body association                                                                | 1,635 | Other           | other                      |

|     |                    |                                                               |       |                     |                         |
|-----|--------------------|---------------------------------------------------------------|-------|---------------------|-------------------------|
| 196 | HOXC6              | homeobox C6                                                   | 1,639 | Nucleus             | transcription regulator |
| 197 | C12orf57           | chromosome 12 open reading frame 57                           | 1,639 | Cytoplasm           | other                   |
| 198 | SNRPN              | small nuclear ribonucleoprotein polypeptide N                 | 1,64  | Nucleus             | other                   |
| 199 | PCBD1              | pterin-4 alpha-carbinolamine dehydratase 1                    | 1,642 | Nucleus             | transcription regulator |
| 200 | CXCL5              | C-X-C motif chemokine ligand 5                                | 1,654 | Extracellular Space | cytokine                |
| 201 | EPB41L4A-AS1       | EPB41L4A antisense RNA 1                                      | 1,656 | Other               | other                   |
| 202 | CXCL16             | C-X-C motif chemokine ligand 16                               | 1,661 | Extracellular Space | cytokine                |
| 203 | RIOX2              | ribosomal oxygenase 2                                         | 1,664 | Nucleus             | enzyme                  |
| 204 | CYBRD1             | cytochrome b reductase 1                                      | 1,665 | Cytoplasm           | enzyme                  |
| 205 | NUPR1              | nuclear protein 1, transcriptional regulator                  | 1,667 | Nucleus             | transcription regulator |
| 206 | ATF4               | activating transcription factor 4                             | 1,679 | Nucleus             | transcription regulator |
| 207 | FTH1P3             | ferritin heavy chain 1 pseudogene 3                           | 1,681 | Other               | other                   |
| 208 | SLC6A9             | solute carrier family 6 member 9                              | 1,681 | Plasma Membrane     | transporter             |
| 209 | FTH1P20            | ferritin heavy chain 1 pseudogene 20                          | 1,682 | Other               | other                   |
| 210 | MSRA               | methionine sulfoxide reductase A                              | 1,693 | Cytoplasm           | enzyme                  |
| 211 | CNTNAP1            | contactin associated protein 1                                | 1,699 | Plasma Membrane     | other                   |
| 212 | EIF4EBP1           | eukaryotic translation initiation factor 4E binding protein 1 | 1,701 | Cytoplasm           | translation regulator   |
| 213 | RPS26P31           | ribosomal protein S26 pseudogene 31                           | 1,705 | Other               | other                   |
| 214 | BCHE               | butyrylcholinesterase                                         | 1,706 | Plasma Membrane     | enzyme                  |
| 215 | LGALS3             | galectin 3                                                    | 1,71  | Extracellular Space | other                   |
| 216 | HIST1H2BK          | histone cluster 1 H2B family member k                         | 1,723 | Nucleus             | other                   |
| 217 | CAT                | catalase                                                      | 1,727 | Cytoplasm           | enzyme                  |
| 218 | ABCA9              | ATP binding cassette subfamily A member 9                     | 1,729 | Cytoplasm           | transporter             |
| 219 | DGCR6/LOC102724770 | DiGeorge syndrome critical region gene 6                      | 1,743 | Nucleus             | other                   |
| 220 | CLIC4              | chloride intracellular channel 4                              | 1,743 | Plasma Membrane     | ion channel             |
| 221 | FAM213A            | family with sequence similarity 213 member A                  | 1,747 | Extracellular Space | other                   |
| 222 | FERMT2             | fermitin family member 2                                      | 1,754 | Cytoplasm           | other                   |
| 223 | ALG13              | ALG13, UDP-N-acetylglucosaminyltransferase subunit            | 1,771 | Cytoplasm           | enzyme                  |
| 224 | GADD45A            | growth arrest and DNA damage inducible alpha                  | 1,777 | Nucleus             | other                   |



|     |           |                                                    |       |                     |               |
|-----|-----------|----------------------------------------------------|-------|---------------------|---------------|
| 225 | GPT2      | glutamic--pyruvic transaminase 2                   | 1,778 | Cytoplasm           | enzyme        |
| 226 | RHOQ      | ras homolog family member Q                        | 1,789 | Plasma Membrane     | enzyme        |
| 227 | ABCA10    | ATP binding cassette subfamily A member 10         | 1,79  | Other               | transporter   |
| 228 | DDIT4     | DNA damage inducible transcript 4                  | 1,806 | Cytoplasm           | other         |
| 229 | DNASE2    | deoxyribonuclease 2, lysosomal                     | 1,823 | Cytoplasm           | enzyme        |
| 230 | ASS1      | argininosuccinate synthase 1                       | 1,837 | Cytoplasm           | enzyme        |
| 231 | RHOQP3    | ras homolog family member Q pseudogene 3           | 1,844 | Other               | other         |
| 232 | SLC3A2    | solute carrier family 3 member 2                   | 1,848 | Plasma Membrane     | transporter   |
| 233 | SLC7A5    | solute carrier family 7 member 5                   | 1,877 | Plasma Membrane     | transporter   |
| 234 | PSPH      | phosphoserine phosphatase                          | 1,878 | Cytoplasm           | phosphatase   |
| 235 | PSAT1P3   | phosphoserine aminotransferase 1 pseudogene 3      | 1,893 | Other               | other         |
| 236 | KIF1A     | kinesin family member 1A                           | 2,001 | Cytoplasm           | other         |
| 237 | HIST1H2BD | histone cluster 1 H2B family member d              | 2,135 | Nucleus             | other         |
| 238 | PSAT1     | phosphoserine aminotransferase 1                   | 2,279 | Cytoplasm           | enzyme        |
| 239 | PCK2      | phosphoenolpyruvate carboxykinase 2, mitochondrial | 2,291 | Cytoplasm           | kinase        |
| 240 | PHGDH     | phosphoglycerate dehydrogenase                     | 2,307 | Cytoplasm           | enzyme        |
| 241 | INHBE     | inhibin beta E subunit                             | 2,34  | Extracellular Space | growth factor |
