# Supplementary material for: Optineurin downregulation induces endoplasmic reticulum stress, chaperone-mediated autophagy, and apoptosis in pancreatic cancer cells
Source: PubMed Central journal article supplement (PMC6689035; doi:10.1038/s41420-019-0206-2), 2019-08-09
Supplement: 41420_2019_206_MOESM6_ESM.pdf [file 41420_2019_206_MOESM6_ESM.pdf]

**Supplementary Table 2: 52 genes modulated in Miapaca and Suit2-007 PDAC cells**

| Gene no.                    | Gene symbol | Entrez Gene Name                                   | Expression fold change | Expression fold change | Cellular location of the respective protein | Function / nature of the protein |
|-----------------------------|-------------|----------------------------------------------------|------------------------|------------------------|---------------------------------------------|----------------------------------|
|                             |             |                                                    | Miapaca                | Suit2-007              |                                             |                                  |
| <b>Down-regulated genes</b> |             |                                                    |                        |                        |                                             |                                  |
| 1                           | HSPE1       | heat shock protein family E (Hsp10) member 1       | -3,096                 | -2,377                 | Cytoplasm                                   | enzyme                           |
| 2                           | OPTN        | optineurin                                         | -3,022                 | -2,627                 | Cytoplasm                                   | other                            |
| 3                           | PRMT6       | protein arginine methyltransferase 6               | -2,467                 | -1,763                 | Nucleus                                     | enzyme                           |
| 4                           | CNN2        | calponin 2                                         | -2,408                 | -1,79                  | Cytoplasm                                   | other                            |
| 5                           | CDK6        | cyclin dependent kinase 6                          | -2,38                  | -1,756                 | Nucleus                                     | kinase                           |
| 6                           | F2R         | coagulation factor II thrombin receptor            | -2,312                 | -1,575                 | Plasma Membrane                             | G-protein coupled receptor       |
| 7                           | RMI2        | RecQ mediated genome instability 2                 | -2,304                 | -1,533                 | Nucleus                                     | other                            |
| 8                           | SKP1        | S-phase kinase associated protein 1                | -2,253                 | -1,743                 | Nucleus                                     | transcription regulator          |
| 9                           | TMEM109     | transmembrane protein 109                          | -2,236                 | -1,965                 | Cytoplasm                                   | other                            |
| 10                          | BORA        | bora, aurora kinase A activator                    | -2,199                 | -1,572                 | Cytoplasm                                   | other                            |
| 11                          | PDIA5       | protein disulfide isomerase family A member 5      | -2,155                 | -1,978                 | Cytoplasm                                   | enzyme                           |
| 12                          | FKBP3       | FK506 binding protein 3                            | -2,112                 | -1,507                 | Nucleus                                     | enzyme                           |
| 13                          | EMG1        | EMG1, N1-specific pseudouridine methyltransferase  | -2,093                 | -1,563                 | Nucleus                                     | enzyme                           |
| 14                          | FRMD8       | FERM domain containing 8                           | -2,02                  | -1,683                 | Other                                       | other                            |
| 15                          | CD81        | CD81 molecule                                      | -2,017                 | -1,653                 | Plasma Membrane                             | other                            |
| 16                          | CDC48       | cell division cycle associated 8                   | -2,015                 | -1,835                 | Nucleus                                     | other                            |
| 17                          | CNIH1       | cornichon family AMPA receptor auxiliary protein 1 | -1,993                 | -1,865                 | Plasma Membrane                             | other                            |
| 18                          | LRRC47      | leucine rich repeat containing 47                  | -1,979                 | -1,632                 | Other                                       | other                            |
| 19                          | STMN1       | stathmin 1                                         | -1,952                 | -1,536                 | Cytoplasm                                   | other                            |
| 20                          | COMMD7      | COMM domain containing 7                           | -1,934                 | -1,871                 | Cytoplasm                                   | other                            |

|                           |               |                                                                      |        |        |                 |                         |
|---------------------------|---------------|----------------------------------------------------------------------|--------|--------|-----------------|-------------------------|
| 21                        | DCAF6         | DDB1 and CUL4 associated factor 6                                    | -1,93  | -1,83  | Nucleus         | transcription regulator |
| 22                        | TMEM199       | transmembrane protein 199                                            | -1,916 | -1,531 | Cytoplasm       | other                   |
| 23                        | HSP90AB1      | heat shock protein 90 alpha family class B member 1                  | -1,858 | -1,583 | Cytoplasm       | enzyme                  |
| 24                        | PRTFDC1       | phosphoribosyl transferase domain containing 1                       | -1,851 | -1,57  | Cytoplasm       | enzyme                  |
| 25                        | HMBS          | hydroxymethylbilane synthase                                         | -1,85  | -1,703 | Cytoplasm       | enzyme                  |
| 26                        | H3F3A/H3F3B   | H3 histone family member 3A                                          | -1,821 | -1,588 | Nucleus         | other                   |
| 27                        | CCNE1         | cyclin E1                                                            | -1,788 | -1,595 | Nucleus         | transcription regulator |
| 28                        | TEAD2         | TEA domain transcription factor 2                                    | -1,745 | -1,578 | Nucleus         | transcription regulator |
| 29                        | HMCES         | 5-hydroxymethylcytosine (hmC) binding, ES cell-specific              | -1,717 | -1,505 | Other           | other                   |
| 30                        | H3F3AP6       | H3 histone, family 3A, pseudogene 6                                  | -1,715 | -1,538 | Other           | other                   |
| 31                        | POFUT1        | protein O-fucosyltransferase 1                                       | -1,675 | -1,72  | Cytoplasm       | enzyme                  |
| 32                        | AZIN1         | antizyme inhibitor 1                                                 | -1,657 | -1,547 | Cytoplasm       | enzyme                  |
| 33                        | TOMM20        | translocase of outer mitochondrial membrane 20                       | -1,656 | -1,51  | Cytoplasm       | transporter             |
| 34                        | COASY         | Coenzyme A synthase                                                  | -1,647 | -1,751 | Cytoplasm       | kinase                  |
| 35                        | TMEM50B       | transmembrane protein 50B                                            | -1,607 | -1,641 | Plasma Membrane | other                   |
| 36                        | ISCU          | iron-sulfur cluster assembly enzyme                                  | -1,548 | -1,829 | Cytoplasm       | other                   |
| 37                        | PPM1F         | protein phosphatase, Mg <sup>2+</sup> /Mn <sup>2+</sup> dependent 1F | -1,533 | -1,728 | Cytoplasm       | phosphatase             |
| 38                        | HSPA1A/HSPA1B | heat shock protein family A (Hsp70) member 1A                        | -1,502 | -1,55  | Cytoplasm       | enzyme                  |
| <b>Up-regulated genes</b> |               |                                                                      |        |        |                 |                         |
| 39                        | ANO1          | anoctamin 1                                                          | 1,573  | 1,887  | Plasma Membrane | ion channel             |
| 40                        | LAMP2         | lysosomal associated membrane protein 2                              | 1,598  | 1,612  | Plasma Membrane | enzyme                  |

|                                    |          |                                                                         |        |        |                 |                         |
|------------------------------------|----------|-------------------------------------------------------------------------|--------|--------|-----------------|-------------------------|
| 41                                 | AASDHPPT | aminoadipate-semialdehyde dehydrogenase-phosphopantetheinyl transferase | 1,605  | 1,505  | Cytoplasm       | enzyme                  |
| 42                                 | HEATR1   | HEAT repeat containing 1                                                | 1,635  | 1,553  | Nucleus         | other                   |
| 43                                 | ARHGEF2  | Rho/Rac guanine nucleotide exchange factor 2                            | 1,664  | 1,856  | Cytoplasm       | other                   |
| 44                                 | BCAT1    | branched chain amino acid transaminase 1                                | 1,689  | 1,534  | Cytoplasm       | enzyme                  |
| 45                                 | CAVIN2   | caveolae associated protein 2                                           | 1,798  | 1,533  | Plasma Membrane | other                   |
| 46                                 | FAM129A  | family with sequence similarity 129 member A                            | 1,81   | 1,892  | Cytoplasm       | other                   |
| 47                                 | CLDN1    | claudin 1                                                               | 1,948  | 1,853  | Plasma Membrane | other                   |
| 48                                 | DESI2    | desumoylating isopeptidase 2                                            | 2,063  | 2,519  | Cytoplasm       | other                   |
| 49                                 | ASNS     | asparagine synthetase (glutamine-hydrolyzing)                           | 2,082  | 1,785  | Cytoplasm       | enzyme                  |
| <b>Differently modulated genes</b> |          |                                                                         |        |        |                 |                         |
| 50                                 | IFITM3   | interferon induced transmembrane protein 3                              | 1,524  | -1,713 | Plasma Membrane | other                   |
| 51                                 | SLC15A3  | solute carrier family 15 member 3                                       | 1,53   | -1,913 | Cytoplasm       | transporter             |
| 52                                 | TAF5     | TATA-box binding protein associated factor 5                            | -1,606 | 1,52   | Nucleus         | transcription regulator |
