# Supplementary material for: Optineurin downregulation induces endoplasmic reticulum stress, chaperone-mediated autophagy, and apoptosis in pancreatic cancer cells
Source: PubMed Central journal article supplement (PMC6689035; doi:10.1038/s41420-019-0206-2), 2019-08-09
Supplement: 41420_2019_206_MOESM7_ESM.pdf [file 41420_2019_206_MOESM7_ESM.pdf]

**Supplementary Table 3: Modulated genes in Suit2-007 cells in response to OPTN knockdown**

| <b>Gene no.</b>             | <b>Gene symbol</b> | <b>Entrez Gene Name</b>                             | <b>Expression fold change</b> | <b>Cellular location of the respective protein</b> | <b>Function / nature of the protein</b> |
|-----------------------------|--------------------|-----------------------------------------------------|-------------------------------|----------------------------------------------------|-----------------------------------------|
| <b>Down-regulated genes</b> |                    |                                                     |                               |                                                    |                                         |
| 1                           | IFI27              | interferon alpha inducible protein 27               | -5,129                        | Cytoplasm                                          | other                                   |
| 2                           | IFI6               | interferon alpha inducible protein 6                | -3,763                        | Cytoplasm                                          | other                                   |
| 3                           | MX1                | MX dynamin like GTPase 1                            | -2,588                        | Cytoplasm                                          | enzyme                                  |
| 4                           | OAS2               | 2'-5'-oligoadenylate synthetase 2                   | -2,48                         | Cytoplasm                                          | enzyme                                  |
| 5                           | IFITM1             | interferon induced transmembrane protein 1          | -2,318                        | Plasma Membrane                                    | transmembrane receptor                  |
| 6                           | SMIM32             | small integral membrane protein 32                  | -2,302                        | Other                                              | other                                   |
| 7                           | IRF9               | interferon regulatory factor 9                      | -2,147                        | Nucleus                                            | transcription regulator                 |
| 8                           | BST2               | bone marrow stromal cell antigen 2                  | -2,107                        | Plasma Membrane                                    | other                                   |
| 9                           | H3F3AP4            | H3 histone, family 3A, pseudogene 4                 | -1,965                        | Other                                              | other                                   |
| 10                          | MSRB2              | methionine sulfoxide reductase B2                   | -1,943                        | Nucleus                                            | transcription regulator                 |
| 11                          | ISG15              | ISG15 ubiquitin-like modifier                       | -1,935                        | Extracellular Space                                | other                                   |
| 12                          | UBE2L6             | ubiquitin conjugating enzyme E2 L6                  | -1,911                        | Cytoplasm                                          | enzyme                                  |
| 13                          | VGLL4              | vestigial like family member 4                      | -1,897                        | Nucleus                                            | other                                   |
| 14                          | SLC2A2             | solute carrier family 2 member 2                    | -1,894                        | Plasma Membrane                                    | transporter                             |
| 15                          | SLC22A3            | solute carrier family 22 member 3                   | -1,843                        | Plasma Membrane                                    | transporter                             |
| 16                          | FCGBP              | Fc fragment of IgG binding protein                  | -1,835                        | Extracellular Space                                | other                                   |
| 17                          | FXVD2              | FXVD domain containing ion transport regulator 2    | -1,827                        | Plasma Membrane                                    | ion channel                             |
| 18                          | RAB40B             | RAB40B, member RAS oncogene family                  | -1,807                        | Plasma Membrane                                    | enzyme                                  |
| 19                          | ARRB1              | arrestin beta 1                                     | -1,8                          | Cytoplasm                                          | other                                   |
| 20                          | POLR3A             | RNA polymerase III subunit A                        | -1,786                        | Nucleus                                            | enzyme                                  |
| 21                          | VAV3               | vav guanine nucleotide exchange factor 3            | -1,783                        | Extracellular Space                                | cytokine                                |
| 22                          | HLA-DMB            | major histocompatibility complex, class II, DM beta | -1,77                         | Plasma Membrane                                    | transmembrane receptor                  |

|    |                         |                                                             |        |                 |                         |
|----|-------------------------|-------------------------------------------------------------|--------|-----------------|-------------------------|
| 23 | IFIT1                   | interferon induced protein with tetratricopeptide repeats 1 | -1,759 | Cytoplasm       | other                   |
| 24 | RGPD4 (includes others) | RANBP2-like and GRIP domain containing 5                    | -1,754 | Nucleus         | enzyme                  |
| 25 | ANKRD33                 | ankyrin repeat domain 33                                    | -1,751 | Nucleus         | transcription regulator |
| 26 | OAS1                    | 2'-5'-oligoadenylate synthetase 1                           | -1,74  | Cytoplasm       | enzyme                  |
| 27 | SLC16A12                | solute carrier family 16 member 12                          | -1,721 | Plasma Membrane | transporter             |
| 28 | OCIAD1                  | OCIA domain containing 1                                    | -1,719 | Cytoplasm       | other                   |
| 29 | S100A4                  | S100 calcium binding protein A4                             | -1,718 | Cytoplasm       | other                   |
| 30 | SPACA6                  | sperm acrosome associated 6                                 | -1,712 | Other           | other                   |
| 31 | ZNF738                  | zinc finger protein 738                                     | -1,712 | Other           | other                   |
| 32 | VSIR                    | V-set immunoregulatory receptor                             | -1,706 | Plasma Membrane | other                   |
| 33 | TOM1                    | target of myb1 membrane trafficking protein                 | -1,696 | Cytoplasm       | transporter             |
| 34 | N4BP2                   | NEDD4 binding protein 2                                     | -1,691 | Cytoplasm       | enzyme                  |
| 35 | IP6K1                   | inositol hexakisphosphate kinase 1                          | -1,688 | Cytoplasm       | kinase                  |
| 36 | PNPT1                   | polyribonucleotide nucleotidyltransferase 1                 | -1,675 | Cytoplasm       | enzyme                  |
| 37 | DNAJC15                 | DnaJ heat shock protein family (Hsp40) member C15           | -1,661 | Cytoplasm       | other                   |
| 38 | LOC729603               | calcineurin like EF-hand protein 1 pseudogene               | -1,657 | Other           | other                   |
| 39 | PGAM1                   | phosphoglycerate mutase 1                                   | -1,639 | Cytoplasm       | phosphatase             |
| 40 | ZNF486                  | zinc finger protein 486                                     | -1,632 | Nucleus         | other                   |
| 41 | BLZF1                   | basic leucine zipper nuclear factor 1                       | -1,629 | Cytoplasm       | transcription regulator |
| 42 | DUXAP10                 | double homeobox A pseudogene 10                             | -1,626 | Other           | other                   |
| 43 | ZNF682                  | zinc finger protein 682                                     | -1,621 | Nucleus         | other                   |
| 44 | MIR22HG                 | MIR22 host gene                                             | -1,616 | Other           | other                   |
| 45 | SULT1A1                 | sulfotransferase family 1A member 1                         | -1,614 | Cytoplasm       | enzyme                  |
| 46 | ZBED3                   | zinc finger BED-type containing 3                           | -1,607 | Cytoplasm       | other                   |
| 47 | GAS5                    | growth arrest specific 5 (non-protein coding)               | -1,602 | Other           | other                   |
| 48 | NFKBIZ                  | NFKB inhibitor zeta                                         | -1,601 | Nucleus         | transcription regulator |
| 49 | PDXK                    | pyridoxal kinase                                            | -1,599 | Cytoplasm       | kinase                  |

|    |                    |                                                                        |        |                     |                                      |
|----|--------------------|------------------------------------------------------------------------|--------|---------------------|--------------------------------------|
| 50 | DMC1               | DNA meiotic recombinase 1                                              | -1,598 | Nucleus             | enzyme                               |
| 51 | CSF2RA             | colony stimulating factor 2 receptor alpha subunit                     | -1,596 | Plasma Membrane     | transmembrane<br>receptor            |
| 52 | LCOR               | ligand dependent nuclear receptor corepressor                          | -1,595 | Nucleus             | transcription<br>regulator           |
| 53 | AKR1D1             | aldo-keto reductase family 1 member D1                                 | -1,592 | Cytoplasm           | enzyme                               |
| 54 | IRF7               | interferon regulatory factor 7                                         | -1,584 | Nucleus             | transcription<br>regulator           |
| 55 | ABRAXAS1           | abraxas 1, BRCA1 A complex subunit                                     | -1,582 | Nucleus             | other                                |
| 56 | HOXA10             | homeobox A10                                                           | -1,578 | Nucleus             | transcription<br>regulator           |
| 57 | LACTB              | lactamase beta                                                         | -1,575 | Cytoplasm           | peptidase                            |
| 58 | LARGE1             | LARGE xylosyl- and glucuronyltransferase 1                             | -1,571 | Cytoplasm           | enzyme                               |
| 59 | SLC10A3            | solute carrier family 10 member 3                                      | -1,567 | Plasma Membrane     | transporter                          |
| 60 | RXRβ               | retinoid X receptor beta                                               | -1,566 | Nucleus             | ligand-dependent<br>nuclear receptor |
| 61 | OPA3               | OPA3, outer mitochondrial membrane lipid<br>metabolism regulator       | -1,559 | Cytoplasm           | other                                |
| 62 | C21orf58           | chromosome 21 open reading frame 58                                    | -1,558 | Other               | other                                |
| 63 | RHBDF1             | rhomboïd 5 homolog 1                                                   | -1,555 | Cytoplasm           | other                                |
| 64 | HLA-DMA            | major histocompatibility complex, class II, DM alpha                   | -1,555 | Plasma Membrane     | transmembrane<br>receptor            |
| 65 | TMEM150A           | transmembrane protein 150A                                             | -1,547 | Plasma Membrane     | other                                |
| 66 | LOC100134868       | uncharacterized LOC100134868                                           | -1,546 | Other               | other                                |
| 67 | TCEA2              | transcription elongation factor A2                                     | -1,544 | Nucleus             | transcription<br>regulator           |
| 68 | LGALS7/LGALS7<br>B | galectin 7                                                             | -1,539 | Extracellular Space | other                                |
| 69 | MCM8               | minichromosome maintenance 8 homologous<br>recombination repair factor | -1,536 | Nucleus             | enzyme                               |
| 70 | LRCH4              | leucine rich repeats and calponin homology domain<br>containing 4      | -1,535 | Cytoplasm           | transcription<br>regulator           |
| 71 | NARF               | nuclear prelamin A recognition factor                                  | -1,531 | Nucleus             | enzyme                               |

|                           |            |                                                     |        |                     |                         |
|---------------------------|------------|-----------------------------------------------------|--------|---------------------|-------------------------|
| 72                        | LINC01018  | long intergenic non-protein coding RNA 1018         | -1,53  | Other               | other                   |
| 73                        | TNFSF10    | TNF superfamily member 10                           | -1,528 | Extracellular Space | cytokine                |
| 74                        | RARRES3    | retinoic acid receptor responder 3                  | -1,527 | Cytoplasm           | enzyme                  |
| 75                        | SETD1A     | SET domain containing 1A                            | -1,526 | Nucleus             | ion channel             |
| 76                        | SMIM1      | small integral membrane protein 1 (Vel blood group) | -1,525 | Cytoplasm           | other                   |
| 77                        | RAB42P1    | RAB42, member RAS oncogene family, pseudogene 1     | -1,522 | Other               | other                   |
| 78                        | ENKD1      | enkurin domain containing 1                         | -1,522 | Cytoplasm           | other                   |
| 79                        | SLC48A1    | solute carrier family 48 member 1                   | -1,521 | Cytoplasm           | transporter             |
| 80                        | CCDC24     | coiled-coil domain containing 24                    | -1,521 | Other               | other                   |
| 81                        | REXO5      | RNA exonuclease 5                                   | -1,518 | Nucleus             | enzyme                  |
| 82                        | NENF       | neudesin neurotrophic factor                        | -1,517 | Extracellular Space | growth factor           |
| 83                        | PSG4       | pregnancy specific beta-1-glycoprotein 4            | -1,516 | Extracellular Space | other                   |
| 84                        | HAUS2      | HAUS augmin like complex subunit 2                  | -1,512 | Cytoplasm           | other                   |
| 85                        | CREB1      | cAMP responsive element binding protein 1           | -1,51  | Nucleus             | transcription regulator |
| 86                        | DEXI       | Dexi homolog                                        | -1,509 | Other               | other                   |
| 87                        | DHRS11     | dehydrogenase/reductase 11                          | -1,508 | Other               | other                   |
| 88                        | DNAJC28    | DnaJ heat shock protein family (Hsp40) member C28   | -1,507 | Other               | other                   |
| 89                        | SLC2A3P1   | solute carrier family 2 member 3 pseudogene 1       | -1,501 | Other               | other                   |
| 90                        | IFITM2     | interferon induced transmembrane protein 2          | -1,501 | Cytoplasm           | other                   |
| <b>Up-regulated genes</b> |            |                                                     |        |                     |                         |
| 91                        | ANKRD10    | ankyrin repeat domain 10                            | 1,501  | Nucleus             | transcription regulator |
| 92                        | SH3KBP1    | SH3 domain containing kinase binding protein 1      | 1,501  | Cytoplasm           | other                   |
| 93                        | GALNT1     | polypeptide N-acetylgalactosaminyltransferase 1     | 1,504  | Cytoplasm           | enzyme                  |
| 94                        | DLGAP1-AS5 | DLGAP1 antisense RNA 5                              | 1,504  | Other               | other                   |
| 95                        | NRP1       | neuropilin 1                                        | 1,505  | Plasma Membrane     | transmembrane receptor  |
| 96                        | TNFRSF21   | TNF receptor superfamily member 21                  | 1,505  | Plasma Membrane     | transmembrane receptor  |

|     |           |                                                               |       |                     |                         |
|-----|-----------|---------------------------------------------------------------|-------|---------------------|-------------------------|
| 97  | FLI1      | Fli-1 proto-oncogene, ETS transcription factor                | 1,507 | Nucleus             | transcription regulator |
| 98  | KLHL7     | kelch like family member 7                                    | 1,508 | Nucleus             | other                   |
| 99  | FOXA2     | forkhead box A2                                               | 1,508 | Nucleus             | transcription regulator |
| 100 | DDX21     | DExD-box helicase 21                                          | 1,508 | Nucleus             | enzyme                  |
| 101 | LRRC58    | leucine rich repeat containing 58                             | 1,509 | Other               | other                   |
| 102 | ARHGAP22  | Rho GTPase activating protein 22                              | 1,51  | Cytoplasm           | other                   |
| 103 | CPSF2     | cleavage and polyadenylation specific factor 2                | 1,51  | Nucleus             | other                   |
| 104 | MATR3     | matrin 3                                                      | 1,511 | Nucleus             | other                   |
| 105 | LINC00239 | long intergenic non-protein coding RNA 239                    | 1,511 | Other               | other                   |
| 106 | CREB5     | cAMP responsive element binding protein 5                     | 1,512 | Nucleus             | transcription regulator |
| 107 | SPP1      | secreted phosphoprotein 1                                     | 1,512 | Extracellular Space | cytokine                |
| 108 | NUDT11    | nudix hydrolase 11                                            | 1,513 | Cytoplasm           | phosphatase             |
| 109 | KIF2A     | kinesin family member 2A                                      | 1,514 | Cytoplasm           | other                   |
| 110 | RBM24     | RNA binding motif protein 24                                  | 1,514 | Other               | other                   |
| 111 | NDUFAF5   | NADH:ubiquinone oxidoreductase complex assembly factor 5      | 1,514 | Cytoplasm           | other                   |
| 112 | SUPT3H    | SPT3 homolog, SAGA and STAGA complex component                | 1,515 | Nucleus             | transcription regulator |
| 113 | HMGN1P30  | high mobility group nucleosome binding domain 1 pseudogene 30 | 1,517 | Other               | other                   |
| 114 | SARS      | seryl-tRNA synthetase                                         | 1,517 | Cytoplasm           | enzyme                  |
| 115 | BRI3BP    | BRI3 binding protein                                          | 1,519 | Extracellular Space | other                   |
| 116 | ALDH1L2   | aldehyde dehydrogenase 1 family member L2                     | 1,523 | Cytoplasm           | enzyme                  |
| 117 | EPCAM     | epithelial cell adhesion molecule                             | 1,523 | Plasma Membrane     | other                   |
| 118 | TCEAL1    | transcription elongation factor A like 1                      | 1,524 | Nucleus             | transcription regulator |
| 119 | PPIAP80   | peptidylprolyl isomerase A pseudogene 80                      | 1,524 | Other               | other                   |
| 120 | FAM135A   | family with sequence similarity 135 member A                  | 1,524 | Other               | enzyme                  |
| 121 | PIM1      | Pim-1 proto-oncogene, serine/threonine kinase                 | 1,524 | Cytoplasm           | kinase                  |
| 122 | BUB3      | BUB3, mitotic checkpoint protein                              | 1,525 | Nucleus             | other                   |

|     |           |                                                                    |       |                     |                            |
|-----|-----------|--------------------------------------------------------------------|-------|---------------------|----------------------------|
| 123 | RAPH1     | Ras association (RalGDS/AF-6) and pleckstrin<br>homology domains 1 | 1,525 | Plasma Membrane     | other                      |
| 124 | WDR36     | WD repeat domain 36                                                | 1,525 | Extracellular Space | other                      |
| 125 | TARS      | threonyl-tRNA synthetase                                           | 1,526 | Nucleus             | enzyme                     |
| 126 | CCNC      | cyclin C                                                           | 1,526 | Nucleus             | kinase                     |
| 127 | PPIAP35   | peptidylprolyl isomerase A pseudogene 35                           | 1,526 | Other               | other                      |
| 128 | NFXL1     | nuclear transcription factor, X-box binding like 1                 | 1,527 | Nucleus             | transcription<br>regulator |
| 129 | ANLN      | anillin actin binding protein                                      | 1,527 | Cytoplasm           | other                      |
| 130 | PDHX      | pyruvate dehydrogenase complex component X                         | 1,528 | Cytoplasm           | enzyme                     |
| 131 | ANXA2P1   | annexin A2 pseudogene 1                                            | 1,531 | Other               | other                      |
| 132 | TMEM33    | transmembrane protein 33                                           | 1,531 | Cytoplasm           | other                      |
| 133 | HNRNPUL1  | heterogeneous nuclear ribonucleoprotein U like 1                   | 1,532 | Nucleus             | other                      |
| 134 | PPT1      | palmitoyl-protein thioesterase 1                                   | 1,533 | Cytoplasm           | enzyme                     |
| 135 | SQOR      | sulfide quinone oxidoreductase                                     | 1,534 | Cytoplasm           | enzyme                     |
| 136 | KIAA2012  | KIAA2012                                                           | 1,537 | Other               | other                      |
| 137 | EGFR      | epidermal growth factor receptor                                   | 1,539 | Plasma Membrane     | kinase                     |
| 138 | SEMA3C    | semaphorin 3C                                                      | 1,54  | Extracellular Space | other                      |
| 139 | KLHL18    | kelch like family member 18                                        | 1,54  | Other               | other                      |
| 140 | RIN2      | Ras and Rab interactor 2                                           | 1,54  | Cytoplasm           | other                      |
| 141 | HDAC2     | histone deacetylase 2                                              | 1,541 | Nucleus             | transcription<br>regulator |
| 142 | ZNF680    | zinc finger protein 680                                            | 1,541 | Nucleus             | other                      |
| 143 | RAB11FIP2 | RAB11 family interacting protein 2                                 | 1,543 | Cytoplasm           | other                      |
| 144 | PYGL      | glycogen phosphorylase L                                           | 1,544 | Cytoplasm           | enzyme                     |
| 145 | IGFBP4    | insulin like growth factor binding protein 4                       | 1,545 | Extracellular Space | other                      |
| 146 | MIR100HG  | mir-100-let-7a-2-mir-125b-1 cluster host gene                      | 1,547 | Other               | other                      |
| 147 | CTNNAL1   | catenin alpha like 1                                               | 1,548 | Plasma Membrane     | other                      |
| 148 | KLF13     | Kruppel like factor 13                                             | 1,548 | Nucleus             | transcription<br>regulator |
| 149 | LURAP1L   | leucine rich adaptor protein 1 like                                | 1,548 | Other               | other                      |
| 150 | RPL22     | ribosomal protein L22                                              | 1,551 | Nucleus             | other                      |
| 151 | RAP1GDS1  | Rap1 GTPase-GDP dissociation stimulator 1                          | 1,551 | Cytoplasm           | other                      |

|     |           |                                                  |       |                     |                         |
|-----|-----------|--------------------------------------------------|-------|---------------------|-------------------------|
| 152 | ETS1      | ETS proto-oncogene 1, transcription factor       | 1,555 | Nucleus             | transcription regulator |
| 153 | GDF15     | growth differentiation factor 15                 | 1,556 | Extracellular Space | growth factor           |
| 154 | CEBPG     | CCAAT/enhancer binding protein gamma             | 1,556 | Nucleus             | transcription regulator |
| 155 | UBASH3B   | ubiquitin associated and SH3 domain containing B | 1,557 | Other               | enzyme                  |
| 156 | ERO1A     | endoplasmic reticulum oxidoreductase 1 alpha     | 1,559 | Cytoplasm           | enzyme                  |
| 157 | KDELC2    | KDEL motif containing 2                          | 1,561 | Other               | other                   |
| 158 | FAR2      | fatty acyl-CoA reductase 2                       | 1,562 | Cytoplasm           | enzyme                  |
| 159 | FERMT1    | fermitin family member 1                         | 1,563 | Plasma Membrane     | other                   |
| 160 | FRMD6     | FERM domain containing 6                         | 1,565 | Cytoplasm           | other                   |
| 161 | LAMA4     | laminin subunit alpha 4                          | 1,567 | Extracellular Space | enzyme                  |
| 162 | SOCS2     | suppressor of cytokine signaling 2               | 1,568 | Cytoplasm           | other                   |
| 163 | SEC23B    | Sec23 homolog B, coat complex II component       | 1,57  | Extracellular Space | transporter             |
| 164 | PRRC2C    | proline rich coiled-coil 2C                      | 1,571 | Cytoplasm           | other                   |
| 165 | TFB2M     | transcription factor B2, mitochondrial           | 1,572 | Cytoplasm           | enzyme                  |
| 166 | TCEA1     | transcription elongation factor A1               | 1,572 | Nucleus             | transcription regulator |
| 167 | ESAM      | endothelial cell adhesion molecule               | 1,574 | Plasma Membrane     | other                   |
| 168 | FAM86B1   | family with sequence similarity 86 member B1     | 1,575 | Other               | other                   |
| 169 | TPST2     | tyrosylprotein sulfotransferase 2                | 1,575 | Cytoplasm           | enzyme                  |
| 170 | KDSR      | 3-ketodihydrosphingosine reductase               | 1,577 | Plasma Membrane     | enzyme                  |
| 171 | GNAI1     | G protein subunit alpha i1                       | 1,578 | Plasma Membrane     | enzyme                  |
| 172 | AKAP12    | A-kinase anchoring protein 12                    | 1,578 | Cytoplasm           | transporter             |
| 173 | ELL2      | elongation factor for RNA polymerase II 2        | 1,58  | Nucleus             | transcription regulator |
| 174 | HNRNPF    | heterogeneous nuclear ribonucleoprotein F        | 1,582 | Nucleus             | other                   |
| 175 | CDV3      | CDV3 homolog                                     | 1,584 | Cytoplasm           | other                   |
| 176 | RPS27AP11 | ribosomal protein S27a pseudogene 11             | 1,585 | Other               | other                   |
| 177 | USP15     | ubiquitin specific peptidase 15                  | 1,589 | Cytoplasm           | peptidase               |
| 178 | AFAP1L1   | actin filament associated protein 1 like 1       | 1,591 | Other               | other                   |
| 179 | STK39     | serine/threonine kinase 39                       | 1,598 | Nucleus             | kinase                  |

|     |                                |                                                                 |       |                     |                            |
|-----|--------------------------------|-----------------------------------------------------------------|-------|---------------------|----------------------------|
| 180 | CALD1                          | caldesmon 1                                                     | 1,599 | Cytoplasm           | other                      |
| 181 | MSH2                           | mutS homolog 2                                                  | 1,603 | Nucleus             | enzyme                     |
| 182 | RTN4                           | reticulon 4                                                     | 1,603 | Cytoplasm           | other                      |
| 183 | NPM1P28                        | nucleophosmin 1 pseudogene 28                                   | 1,606 | Other               | other                      |
| 184 | MYO19                          | myosin XIX                                                      | 1,609 | Cytoplasm           | enzyme                     |
| 185 | KANK1                          | KN motif and ankyrin repeat domains 1                           | 1,611 | Nucleus             | transcription<br>regulator |
| 186 | ANKRD20A4<br>(includes others) | ankyrin repeat domain 20 family member A4                       | 1,612 | Plasma Membrane     | other                      |
| 187 | PTGFRN                         | prostaglandin F2 receptor inhibitor                             | 1,613 | Plasma Membrane     | other                      |
| 188 | FLNB                           | filamin B                                                       | 1,614 | Cytoplasm           | other                      |
| 189 | CBFB                           | core-binding factor beta subunit                                | 1,616 | Nucleus             | transcription<br>regulator |
| 190 | IMPA1                          | inositol monophosphatase 1                                      | 1,625 | Cytoplasm           | phosphatase                |
| 191 | MAMLD1                         | mastermind like domain containing 1                             | 1,627 | Nucleus             | other                      |
| 192 | WLS                            | wntless Wnt ligand secretion mediator                           | 1,627 | Cytoplasm           | other                      |
| 193 | ARMCX1                         | armadillo repeat containing, X-linked 1                         | 1,633 | Other               | other                      |
| 194 | BZW1P2                         | basic leucine zipper and W2 domains 1 pseudogene 2              | 1,636 | Other               | other                      |
| 195 | LAMB3                          | laminin subunit beta 3                                          | 1,64  | Extracellular Space | transporter                |
| 196 | LOX                            | lysyl oxidase                                                   | 1,64  | Extracellular Space | enzyme                     |
| 197 | INTS13                         | integrator complex subunit 13                                   | 1,644 | Cytoplasm           | other                      |
| 198 | FABP5P2                        | fatty acid binding protein 5 pseudogene 2                       | 1,647 | Cytoplasm           | other                      |
| 199 | XPO1                           | exportin 1                                                      | 1,652 | Nucleus             | transporter                |
| 200 | STEAP1B                        | STEAP family member 1B                                          | 1,655 | Other               | other                      |
| 201 | GARS                           | glycyl-tRNA synthetase                                          | 1,656 | Cytoplasm           | enzyme                     |
| 202 | FEZ2                           | fasciculation and elongation protein zeta 2                     | 1,661 | Cytoplasm           | other                      |
| 203 | RNU6-15P                       | RNA, U6 small nuclear 15, pseudogene                            | 1,664 | Other               | other                      |
| 204 | ARFGEF1                        | ADP ribosylation factor guanine nucleotide exchange<br>factor 1 | 1,668 | Cytoplasm           | other                      |
| 205 | CMPK1                          | cytidine/uridine monophosphate kinase 1                         | 1,673 | Nucleus             | kinase                     |
| 206 | INF2                           | inverted formin, FH2 and WH2 domain containing                  | 1,677 | Cytoplasm           | other                      |



|     |         |                                                                    |       |                     |                         |
|-----|---------|--------------------------------------------------------------------|-------|---------------------|-------------------------|
| 207 | ITGA2   | integrin subunit alpha 2                                           | 1,679 | Plasma Membrane     | transmembrane receptor  |
| 208 | RPL34   | ribosomal protein L34                                              | 1,679 | Cytoplasm           | other                   |
| 209 | NACAP1  | nascent polypeptide associated complex alpha subunit pseudogene 1  | 1,685 | Other               | other                   |
| 210 | KPNA3   | karyopherin subunit alpha 3                                        | 1,697 | Nucleus             | transporter             |
| 211 | MBTPS2  | membrane bound transcription factor peptidase, site 2              | 1,697 | Cytoplasm           | peptidase               |
| 212 | SLC30A9 | solute carrier family 30 member 9                                  | 1,699 | Nucleus             | transporter             |
| 213 | PEG10   | paternally expressed 10                                            | 1,704 | Nucleus             | other                   |
| 214 | NT5DC1  | 5'-nucleotidase domain containing 1                                | 1,704 | Other               | other                   |
| 215 | TMEM156 | transmembrane protein 156                                          | 1,71  | Other               | other                   |
| 216 | IFFO1   | intermediate filament family orphan 1                              | 1,711 | Other               | other                   |
| 217 | UQCRH   | ubiquinol-cytochrome c reductase hinge protein                     | 1,716 | Cytoplasm           | enzyme                  |
| 218 | WWP1P1  | WW domain containing E3 ubiquitin protein ligase 1 pseudogene 1    | 1,719 | Other               | other                   |
| 219 | VIM     | vimentin                                                           | 1,722 | Cytoplasm           | other                   |
| 220 | KHDRBS3 | KH RNA binding domain containing, signal transduction associated 3 | 1,732 | Nucleus             | other                   |
| 221 | DSC2    | desmocollin 2                                                      | 1,738 | Plasma Membrane     | other                   |
| 222 | POU2F1  | POU class 2 homeobox 1                                             | 1,747 | Nucleus             | transcription regulator |
| 223 | KLF4    | Kruppel like factor 4                                              | 1,748 | Nucleus             | transcription regulator |
| 224 | VSNL1   | visinin like 1                                                     | 1,752 | Cytoplasm           | other                   |
| 225 | XRN1    | 5'-3' exoribonuclease 1                                            | 1,762 | Cytoplasm           | enzyme                  |
| 226 | FAM49B  | family with sequence similarity 49 member B                        | 1,765 | Extracellular Space | other                   |
| 227 | SLCO1B3 | solute carrier organic anion transporter family member 1B3         | 1,773 | Plasma Membrane     | transporter             |
| 228 | LAMB1   | laminin subunit beta 1                                             | 1,777 | Extracellular Space | other                   |
| 229 | HPGD    | 15-hydroxyprostaglandin dehydrogenase                              | 1,779 | Cytoplasm           | enzyme                  |
| 230 | SNORD3D | small nucleolar RNA, C/D box 3D                                    | 1,786 | Other               | other                   |
| 231 | SRPX    | sushi repeat containing protein, X-linked                          | 1,79  | Cytoplasm           | other                   |

|     |          |                                                                                        |       |                     |             |
|-----|----------|----------------------------------------------------------------------------------------|-------|---------------------|-------------|
| 232 | C1QTNF1  | C1q and TNF related 1                                                                  | 1,794 | Extracellular Space | other       |
| 233 | LAT2     | linker for activation of T cells family member 2                                       | 1,799 | Plasma Membrane     | other       |
| 234 | TJP1     | tight junction protein 1                                                               | 1,805 | Plasma Membrane     | other       |
| 235 | PLIN2    | perilipin 2                                                                            | 1,806 | Plasma Membrane     | other       |
| 236 | FABP5    | fatty acid binding protein 5                                                           | 1,807 | Cytoplasm           | transporter |
| 237 | PLEK2    | pleckstrin 2                                                                           | 1,821 | Plasma Membrane     | other       |
| 238 | ADAM19   | ADAM metallopeptidase domain 19                                                        | 1,852 | Plasma Membrane     | peptidase   |
| 239 | DCLK1    | doublecortin like kinase 1                                                             | 1,892 | Plasma Membrane     | kinase      |
| 240 | CARD11   | caspase recruitment domain family member 11                                            | 1,911 | Cytoplasm           | kinase      |
| 241 | HAS3     | hyaluronan synthase 3                                                                  | 1,925 | Plasma Membrane     | enzyme      |
| 242 | 4-Mar    | membrane associated ring-CH-type finger 4                                              | 1,944 | Cytoplasm           | enzyme      |
| 243 | IGFBP3   | insulin like growth factor binding protein 3                                           | 1,958 | Extracellular Space | other       |
| 244 | LAMC2    | laminin subunit gamma 2                                                                | 1,974 | Extracellular Space | other       |
| 245 | NPM1P42  | nucleophosmin 1 pseudogene 42                                                          | 1,993 | Other               | other       |
| 246 | NT5E     | 5'-nucleotidase ecto                                                                   | 1,994 | Plasma Membrane     | phosphatase |
| 247 | TGM2     | transglutaminase 2                                                                     | 2,017 | Cytoplasm           | enzyme      |
| 248 | DUSP5    | dual specificity phosphatase 5                                                         | 2,02  | Nucleus             | phosphatase |
| 249 | MTND5P10 | mitochondrially encoded NADH:ubiquinone<br>oxidoreductase core subunit 5 pseudogene 10 | 2,097 | Other               | other       |
| 250 | MCFD2    | multiple coagulation factor deficiency 2                                               | 2,121 | Cytoplasm           | other       |
| 251 | STC1     | stanniocalcin 1                                                                        | 2,182 | Extracellular Space | kinase      |
| 252 | SPAG9    | sperm associated antigen 9                                                             | 2,56  | Cytoplasm           | other       |
