# Supplementary material for: Optineurin downregulation induces endoplasmic reticulum stress, chaperone-mediated autophagy, and apoptosis in pancreatic cancer cells
Source: PubMed Central journal article supplement (PMC6689035; doi:10.1038/s41420-019-0206-2), 2019-08-09
Supplement: 41420_2019_206_MOESM8_ESM.pdf [file 41420_2019_206_MOESM8_ESM.pdf]

**Supplementary Table 4: Overview of primers and probes used for qRT-PCR**

| <b>Gene name</b> | <b>Primers left</b>       | <b>Primers right</b>     | <b>Probe<sup>a)</sup></b> |
|------------------|---------------------------|--------------------------|---------------------------|
| <b>OPTN</b>      | agcaaaccattgccaagc        | ttcagcatgaaaatcagaacag   | 85                        |
| <b>MAP1LC3B</b>  | cgcaccttcgaacaaagag       | ctcaccttgatcgttctattatca | 89                        |
| <b>CDK4</b>      | gtgcagtcggtggtacctg       | ttcgttggtgggtaaaa        | 25                        |
| <b>CDK6</b>      | gaactaggcaaagacactactctga | ggtgggaatccaggtttct      | 85                        |
| <b>CCND1</b>     | gtgccggccttctagtt         | ggatttagggggtgaggtg      | 21                        |
| <b>CCND3</b>     | gggatcactggcactgaag       | cctgaggtctccctgagt       | 68                        |
| <b>GAPDH</b>     | agccacatcgctcagacac       | gcccaatacgaccaaatec      | 60                        |

<sup>a)</sup>The numbers correspond to the numbers of the universal probe library (Roche, Mannheim, Germany)
